## A COMPARISON OF CO<sub>2</sub> EXCRETION IN A SPONTANEOUSLY VENTILATING BLOOD- PERFUSED TROUT PREPARATION AND SALINE- PERFUSED GILL PREPARATIONS: CONTRIBUTION OF THE BRANCHIAL EPITHELIUM AND RED BLOOD CELL

BY STEVE F. PERRY, PETER S. DAVIE\*, CHARLES DAXBOECK†  
AND DAVID J. RANDALL

*Department of Zoology, The University of British Columbia,  
2354-6270 University Boulevard, Vancouver, B.C., Canada V6T 2A9*

(Received 3 December 1981 - Accepted 16 April 1982)

### SUMMARY

(1) A spontaneously ventilating blood-perfused trout preparation and saline perfused gill preparations were utilized to investigate the role of the erythrocyte and branchial epithelium in CO<sub>2</sub> excretion and acid-base regulation.

(2) CO<sub>2</sub> excretion ( $\dot{M}_{\text{CO}_2}$ ) in blood-perfused preparations was positively correlated with haematocrit (Hct), and was abolished completely during plasma-perfusion.

(3) Elevating HCO<sub>3</sub><sup>-</sup> concentration of input blood from 10 to 25 mM significantly increased  $\dot{M}_{\text{CO}_2}$  fourfold in blood-perfused preparations as a result of increased entry of HCO<sub>3</sub><sup>-</sup> into the red blood cell and not into the gill epithelium. Increased HCO<sub>3</sub><sup>-</sup> concentration was without effect in totally saline-perfused coho salmon (*Onchorynchus kisutch*).

(4) The addition of 4-acetamido-4'-*iso*-thiocyanatostilbene-2,2' disulfonic acid (SITS; 10<sup>-4</sup> M) to input blood significantly reduced  $\dot{M}_{\text{CO}_2}$  and oxygen uptake ( $\dot{M}_{\text{O}_2}$ ) in blood-perfused fish due to inhibition of erythrocytic HCO<sub>3</sub><sup>-</sup>/Cl<sup>-</sup> exchange.

(5) Unlike blood-perfused preparations, no saline-perfused preparation (isolated holobranchs or totally perfused rainbow trout or coho salmon) displayed measureable CO<sub>2</sub> excretion at physiological  $P_{\text{CO}_2}$  and pH.

(6) Increased input  $P_{\text{CO}_2}$  in both blood-perfused and saline-perfused preparations significantly increased  $\dot{M}_{\text{CO}_2}$  due to enhanced branchial diffusion of molecular CO<sub>2</sub>.

(7) It is concluded that the entry of HCO<sub>3</sub><sup>-</sup> into the erythrocyte is the rate-limiting step in CO<sub>2</sub> excretion and that movement of HCO<sub>3</sub><sup>-</sup> from plasma to gill epithelium cells in no way contributes to overall CO<sub>2</sub> elimination.

\* Department of Physiology and Anatomy, Massey University Palmerston North, New Zealand.

† Pacific Gamefish Foundation, P.O. Box 25115, Honolulu, Hawaii, U.S.A. 96825

## INTRODUCTION

In recent years a controversy has existed regarding the pattern of  $\text{CO}_2$  excretion in fish. Haswell & Randall (1976, 1978) proposed a model for  $\text{CO}_2$  excretion in fish which suggested that red blood cells are not involved. They proposed that fish erythrocytes are functionally impermeable to bicarbonate, making erythrocyte carbonic anhydrase unavailable for the dehydration of plasma bicarbonate. Instead, it was postulated that branchial carbonic anhydrase catalyses the dehydration reaction and that entry of bicarbonate from plasma to gill epithelial cells is the rate-limiting step in  $\text{CO}_2$  excretion (Haswell, Randall & Perry, 1980). This theory, of course, drastically contrasts with the more widely accepted view, that erythrocytic carbonic anhydrase catalyses the dehydration of plasma bicarbonate in a typical mammalian fashion. In this scheme branchial carbonic anhydrase is assigned the role of rehydrating plasma  $\text{CO}_2$  thereby furnishing the counter-ions,  $\text{HCO}_3^-$  and  $\text{H}^+$  ( $\text{NH}_4^+$ ), for exchange with  $\text{Cl}^-$  and  $\text{Na}^+$  respectively, at the apical (water-facing) membrane of gill epithelial cells (Maetz, 1971).

The primary objective of this study was to assess the relative importance of the branchial epithelium and red blood cell in  $\text{CO}_2$  excretion by a comparison of a blood-perfused trout preparation and other saline-perfused gill preparations under a variety of conditions. Experiments were specifically designed to test the two conflicting theories of  $\text{CO}_2$  excretion utilizing the spontaneously ventilating blood-perfused trout preparation described in the first article of this series (Davie *et al.* 1982).

## MATERIAL AND METHODS

Rainbow trout (*Salmo gairdneri*) weighing between 200–400 g were obtained from Sun Valley Trout Farm (Mission, B.C.). They were kept in large circular fibreglass tanks supplied with aerated, dechlorinated, Vancouver tap water ( $\text{Na}^+ = 40 \mu\text{equiv. l}^{-1}$ ,  $\text{Cl}^- = 20 \mu\text{equiv. l}^{-1}$ , hardness = 12 ppm  $\text{CaCO}_3$ ), at ambient temperature (7–12 °C) and photoperiod. Fish were fed daily with a commercial pelleted trout diet (Moore–Clark Co.). They were not fed for 48 h prior to, or during experiments. Experiments involving seawater were performed at Bamfield Marine Station (Bamfield, B.C.). Coho salmon (*Oncorhynchus kisutch*) weighing between 300–500 g were obtained from Pacific Biological Station (Nanaimo, B.C.). They were maintained in flowing seawater in a manner similar to rainbow trout.

*Experimental protocol**(1) Spontaneously ventilating, blood-perfused trout preparation*

A spontaneously ventilating, blood-perfused trout preparation was prepared as described by Davie *et al.* (1982). Fish were perfused for 2–3 h, allowing recovery from the acute effects of anaesthesia (Houston, Madden, Woods & Miles, 1971), before experimentation commenced. Experiments involved manipulation of input blood haematocrit (Hct),  $P_{\text{CO}_2}$ , and total  $\text{CO}_2$  ( $C_{\text{CO}_2}$ ) as well as the addition of the anion transport inhibitor, SITS (4-acetamido-4'-*iso*-thiocyanatostilbene-2,2' disul-

onic acid). Typically, 'normal' blood samples were withdrawn from tonometer (input), dorsal aorta and venous return and analyzed immediately for  $C_{CO_2}$ ,  $C_{O_2}$ , pH,  $P_{O_2}$  and Hct (see Davie *et al.* 1982). Input blood then was changed by switching to another tonometer which had been prepared appropriately. Following a 5 min adjustment period, blood samples again were withdrawn and analyzed. A normal period of 5 min and a sample always preceded and followed any experimental period.

Input blood Hct was adjusted either by adding known volumes of red blood cells or plasma, obtained from donor fish. Three categories of blood were utilized: 'normal' Hct (approx. 10%), high Hct (approx. 20%), and low Hct (approx. 4%).  $P_{CO_2}$  was doubled by changing the gas mixture equilibrating the blood from 0.4% to 0.8% CO<sub>2</sub> in 40% air (remainder N<sub>2</sub>). These mixtures were provided by gas mixing pumps (Wösthoff). Blood  $C_{CO_2}$  was increased by the addition of known quantities of NaHCO<sub>3</sub>. SITS (British Drug House) was added to a final concentration of 10<sup>-4</sup> M. Blood and buccal pressures were monitored continuously as described previously (Davie *et al.* 1982).

## (2) *Isolated, saline-perfused rainbow trout holobranch preparation*

Approximately 30 min prior to surgical procedures, fish were injected intraperitoneally with sodium heparin (5000 USP units.kg<sup>-1</sup>). Following this period, fish were anaesthetized in a solution of 1:15000 MS 222 (pH adjusted to 7.0–7.5) and transferred to an operating table (Smith & Bell, 1967) where 1:20000 MS 222 was recirculated over the gills. The heart and ventral aorta were exposed by a ventral, midline incision. The bulbus arteriosus/ventral aorta was cannulated with a short length of polyethylene tubing (PE 160; 1.14 mm × 1.57 mm) and secured in place. The gills were cleared of blood by perfusing manually with filtered (Millipore, 0.45 µm), heparinized (10 USP units.ml<sup>-1</sup>) Cortland saline (Wolf, 1963). The branchial basket was removed and individual holobranchs dissected free and stored in aerated saline on ice, until required.

Afferent and efferent arch vessels were exposed and cannulated with blunt 20 or 21 gauge hypodermic needles depending on the diameter of the vessels (Farrell, Daxboeck & Randall, 1979). Holobranchs remained submerged in ice-cold saline during these procedures. The gill arch was ligated as near to the catheter as possible, leaving a minimal amount of cut tissue perfused. Cannulated holobranchs were suspended in an aerated, well-mixed water bath at constant temperature and perfused at constant flow (2.2 ml.min<sup>-1</sup>.arch<sup>-1</sup>.kg<sup>-1</sup> body weight) with gas equilibrated Cortland saline (0.5% CO<sub>2</sub> in 40% air, remainder N<sub>2</sub>) using a syringe pump (Harvard). Input pressure was monitored with a Harvard pressure transducer and displayed on a chart recorder. Experiments did not commence until input pressure had stabilized (usually 20–30 min).

Protocol consisted of sampling afferent and efferent saline while perfusing with saline equilibrated with normal (0.5%) and high (2.0%) CO<sub>2</sub>. Gas mixtures were supplied by gas mixing pumps (Wösthoff).  $C_{CO_2}$  was determined using the method of Cameron (1971) with a Radiometer PHM-71 acid-base analyser and associated CO<sub>2</sub> electrode (E5036/0) maintained at 45 °C to speed electrode response. pH measurements were made using the same acid-base analyzer and micro pH electrode (G297/

G<sub>2</sub>).  $P_{\text{CO}_2}$  was calculated using the measured pH and  $C_{\text{CO}_2}$  values and a re-organization of the Henderson-Hasselbalch equation as follows:

$$P_{\text{CO}_2} = \frac{C_{\text{CO}_2}}{[\text{anti-log (pH-pK')} (\alpha\text{CO}_2)] + \alpha\text{CO}_2} \quad (1)$$

The operational  $\text{pK}'$  values of carbonic acid were obtained from Severinghaus, Stupfel & Bradley (1956) and the solubility coefficients of  $\text{CO}_2$  ( $\alpha\text{CO}_2$ ) were obtained from Albers (1970).

### (3) *Totally saline-perfused rainbow trout and coho salmon*

Totally perfused preparations were prepared as described by Wood, McMahon & McDonald (1978). Briefly, the ventral aorta of pre-heparinized fish (2000 USP units.fish<sup>-1</sup>) was exposed, sectioned and cannulated orthograde and retrograde using polyethylene tubing (PE 190; 1.19 mm × 1.70 mm). Filtered Cortland saline (Millipore, 0.45 μm) was infused orthograde with 100 ml syringe until the venous effluent appeared free of blood (approx. 10 min). A tube for ventilation was placed into the mouth and sewn into position. Fish then were transferred to a darkened, rectangular Perspex box and perfused with Cortland saline (equilibrated with 0.4%  $\text{CO}_2$  in 40% air, remainder  $\text{N}_2$ ) at constant flow (17 ml.min.<sup>-1</sup>.kg<sup>-1</sup>) (Kiceniuk & Jones, 1977) using a pulsatile pump (Watson-Marlow) and artificially ventilated at 500 ml.min<sup>-1</sup>. Input samples were taken from a T-junction in the infusion line near the ventral aorta and arterial samples were taken from a dorsal aortic cannula (Smith, 1978) implanted 24 h previously.  $C_{\text{CO}_2}$  and pH were determined as described above.

Experiments involved manipulating  $P_{\text{CO}_2}$  (rainbow trout) and  $C_{\text{CO}_2}$  (coho salmon) while monitoring input and dorsal aortic pH and  $C_{\text{CO}_2}$ .  $C_{\text{CO}_2}$  was adjusted by addition of  $\text{NaHCO}_3$  and  $P_{\text{CO}_2}$  was adjusted using gas mixing pumps (Wösthoff).

All experimental values are presented in tables as means ± S.E.M. Results were statistically analysed using Student's *t*-test between sample means where appropriate, and 5 or 10% was taken as the fiducial limit of significance (see Tables).

## RESULTS

### (1) *Spontaneously ventilating, blood-perfused rainbow trout*

The effects of Hct on respiratory and acid-base status in the spontaneously ventilating, blood-perfused rainbow trout are shown in Fig. 1 and Table 1.  $\text{CO}_2$  excretion across the gills ( $\dot{M}_{\text{CO}_2}$ ) increased as Hct was raised. Input blood  $\text{CO}_2$  content ( $C_{\text{CO}_2}$ ) remained virtually constant in all three groups indicating little or no carbamino- $\text{CO}_2$  formation in the blood. Net hydrogen ion flux ( $\Delta\text{H}^+$ ) in all cases was in the direction of water to blood but decreased significantly in the high Hct group. The effect of Hct on branchial and systemic haemodynamics has been discussed previously (see Davie *et al.* 1982) and cannot explain the observed effects on blood respiratory and acid-base status. In two instances fish were perfused with plasma; during this condition  $\dot{M}_{\text{CO}_2}$  was abolished completely while dorsal aortic  $P_{\text{O}_2}$  remained unchanged.

Increasing  $\text{HCO}_3^-$  concentration of input blood to approximately 25 mM significantly increased  $\dot{M}_{\text{CO}_2}$  four-fold (Table 2).  $C_{\text{O}_2}$  was not affected although  $\dot{M}$ .

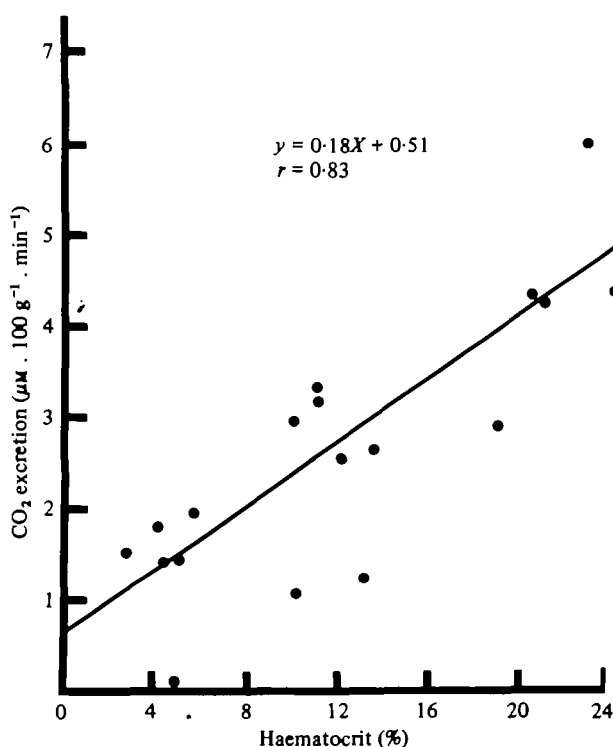

Fig. 1. The effect of haematocrit on CO<sub>2</sub> excretion in the spontaneously ventilating, blood-perfused rainbow trout, *Salmo gairdneri*. See text for further details.

Table 1. Summary of blood carbon dioxide and acid-base status in the spontaneously ventilating, blood-perfused rainbow trout perfused with three different haematocrits; low, normal and high

| (n = 6 fish $\pm$ S.E.M.)     |                |                                                                      |                                    |
|-------------------------------|----------------|----------------------------------------------------------------------|------------------------------------|
|                               | Hct            | C <sub>CO<sub>2</sub></sub> (mM)                                     | [H <sup>+</sup> ] (nM)             |
| Input blood                   |                |                                                                      |                                    |
| (I) Low                       | 4.3 $\pm$ 0.4  | 10.87 $\pm$ 0.6                                                      | 15.78 $\pm$ 1.1 (7.81)†            |
| (II) Normal                   | 11.3 $\pm$ 0.5 | 10.73 $\pm$ 0.5                                                      | 16.87 $\pm$ 1.3 (7.78)             |
| (III) High                    | 20.2 $\pm$ 1.6 | 11.30 $\pm$ 0.6                                                      | 18.39 $\pm$ 1.4 (7.75)             |
| Dorsal aortic blood           |                |                                                                      |                                    |
| (I) Low                       | 3.9 $\pm$ 0.5  | 10.06 $\pm$ 0.5                                                      | 19.58 $\pm$ 2.2 (7.72)             |
| (II) Normal                   | 9.3 $\pm$ 0.5  | 9.12 $\pm$ 0.4                                                       | 18.27 $\pm$ 2.0 (7.75)             |
| (III) High                    | 16.5 $\pm$ 1.2 | 8.90 $\pm$ 0.3                                                       | 18.42 $\pm$ 1.9 (7.75)             |
| $\Delta$ Input - Dorsal Aorta |                |                                                                      |                                    |
|                               | Hct (%)        | $\dot{M}_{\text{CO}_2}$ ( $\mu\text{mol}/100 \text{ g}/\text{min}$ ) | [H <sup>+</sup> ] (pmol/100 g/min) |
| (I) Low                       | -0.4           | 1.34 $\pm$ 0.3                                                       | 6.00 $\pm$ 3.5                     |
| (II) Normal                   | -2.0           | 2.62 $\pm$ 0.3                                                       | 2.07 $\pm$ 1.5                     |
| (III) High                    | -5.2           | 3.87 $\pm$ 0.7                                                       | 0.13 $\pm$ 1.7                     |

† Corresponding pH value.

Table 2. *Effect of blood  $[\text{HCO}_3^-]$  on blood respiratory and acid-base status in the spontaneously ventilating, blood-perfused rainbow trout*

|                               | $C_{\text{O}_{0.5}}$<br>(mm)                                           | $C_{\text{O}_2}$<br>(mm)                                           | $P_{\text{O}_2}$<br>(mmHg) | $P_{\text{O}_{0.5}}$<br>(mmHg) | $[\text{H}^+]$<br>(nM)                                                   |
|-------------------------------|------------------------------------------------------------------------|--------------------------------------------------------------------|----------------------------|--------------------------------|--------------------------------------------------------------------------|
| Input blood                   |                                                                        |                                                                    |                            |                                |                                                                          |
| (I) Normal                    | $9.86 \pm 0.5$                                                         | $1.18 \pm 0.2$                                                     | $30.1 \pm 4.4$             | $3.54 \pm 0.2$                 | $18.32 \pm 1.7$ (7.74)†                                                  |
| (II) High $[\text{HCO}_3^-]$  | $24.74 \pm 1.0^{**}$                                                   | $1.20 \pm 0.3$                                                     | $23.8 \pm 4.7$             | $5.50 \pm 0.4^{**}$            | $11.36 \pm 1.1$ (7.96)*                                                  |
| Dorsal aortic blood           |                                                                        |                                                                    |                            |                                |                                                                          |
| (I) Normal                    | $8.5 \pm 0.4$                                                          | $1.86 \pm 0.3$                                                     | $109.0 \pm 3.9$            | $4.36 \pm 0.7$                 | $23.91 \pm 3.4$ (7.64)                                                   |
| (II) High $[\text{HCO}_3^-]$  | $20.58 \pm 1.0^{**}$                                                   | $1.71 \pm 0.3$                                                     | $89.9 \pm 4.7^{**}$        | $5.03 \pm 0.7$                 | $12.22 \pm 1.7$ (7.93)**                                                 |
| $\Delta$ Input - Dorsal Aorta |                                                                        |                                                                    |                            |                                |                                                                          |
|                               | $\dot{M}_{\text{O}_{0.5}}$<br>( $\mu\text{mol}/100 \text{ g}/$<br>min) | $\dot{M}_{\text{O}_2}$<br>( $\mu\text{mol}/100 \text{ g}/$<br>min) | $P_{\text{O}_2}$<br>(mmHg) | $P_{\text{O}_{0.5}}$<br>(mmHg) | $[\text{H}^+]$<br>( $\mu\text{mol}/100 \text{ g}/$<br>min) $\text{RE}_g$ |
| (I) Normal                    | $1.63 \pm 0.3$                                                         | $1.13 \pm 0.3$                                                     | $78.8 \pm 6.5$             | $0.82 \pm 0.5$                 | $8.71 \pm 3.8$ 1.4                                                       |
| (II) High $[\text{HCO}_3^-]$  | $6.50 \pm 0.4^{**}$                                                    | $0.84 \pm 0.3$                                                     | $66.2 \pm 6.9^*$           | $-0.53 \pm 0.8$                | $1.11 \pm 2.7^*$ 7.7                                                     |

† Corresponding pH value.

\* Significantly different from normal value at 10 %

\*\* Significantly different from normal value at 5 %

Table 3. *Effect of SITS ( $10^{-4}$ ) on blood respiratory and acid-base status in the spontaneously ventilating, blood-perfused rainbow trout*

|                               | $C_{\text{O}_{0.5}}$<br>(mm)                                           | $C_{\text{O}_2}$<br>(mm)                                           | $P_{\text{O}_2}$<br>(mmHg) | $P_{\text{O}_{0.5}}$<br>(mmHg) | $[\text{H}^+]$<br>(nM)                                     |
|-------------------------------|------------------------------------------------------------------------|--------------------------------------------------------------------|----------------------------|--------------------------------|------------------------------------------------------------|
| Input blood                   |                                                                        |                                                                    |                            |                                |                                                            |
| (I) Normal                    | $11.51 \pm 0.3$                                                        | $1.06 \pm 0.2$                                                     | $20.9 \pm 1.9$             | $2.98 \pm 0.3$                 | $12.71 \pm 1.2$ (7.90)†                                    |
| (II) $10^{-4}$ M SITS         | $10.50 \pm 0.4^*$                                                      | $1.22 \pm 0.2$                                                     | $27.0 \pm 3.2^*$           | $3.16 \pm 0.3^{**}$            | $14.71 \pm 0.9$ (7.83)*                                    |
| Dorsal Aortic Blood           |                                                                        |                                                                    |                            |                                |                                                            |
| (I) Normal                    | $9.84 \pm 0.3$                                                         | $1.83 \pm 0.4$                                                     | $87.7 \pm 5.8$             | $3.27 \pm 0.3$                 | $16.16 \pm 1.0$ (7.79)                                     |
| (II) $10^{-4}$ M SITS         | $9.97 \pm 0.4$                                                         | $1.69 \pm 0.3$                                                     | $89.3 \pm 6.0$             | $4.11 \pm 0.3^{**}$            | $19.65 \pm 0.9$ (7.71)**                                   |
| $\Delta$ Input - Dorsal Aorta |                                                                        |                                                                    |                            |                                |                                                            |
|                               | $\dot{M}_{\text{O}_{0.5}}$<br>( $\mu\text{mol}/100 \text{ g}/$<br>min) | $\dot{M}_{\text{O}_2}$<br>( $\mu\text{mol}/100 \text{ g}/$<br>min) | $P_{\text{O}_2}$<br>(mmHg) | $P_{\text{O}_{0.5}}$<br>(mmHg) | $[\text{H}^+]$<br>( $\mu\text{mol}/100 \text{ g}/$<br>min) |
| (I) Normal                    | $2.57 \pm 0.3$                                                         | $1.21 \pm 0.3$                                                     | $65.6 \pm 5.6$             | $0.29 \pm 0.3$                 | $2.05 \pm 0.5$                                             |
| (II) $10^{-4}$ M SITS         | $0.80 \pm 0.2^{**}$                                                    | $0.70 \pm 0.3^*$                                                   | $62.3 \pm 6.2$             | $0.95 \pm 0.3^*$               | $4.94 \pm 1.5$                                             |

† Corresponding pH value.

\* Significantly different from normal value at 10 %.

\*\* Significantly different from normal value at 5 %

appeared to decrease (not significant). In addition, increased  $[\text{HCO}_3^-]$  was associated with significant decreases in dorsal aortic  $P_{\text{O}_2}$ ,  $\Delta P_{\text{O}_2}$  and  $\Delta \text{H}^+$  across the gills (Table 2). Branchial haemodynamics and ventilation were unaffected by  $\text{HCO}_3^-$  treatment.

The stilbonic acid derivative SITS has been used to inhibit chloride transport in red blood cells as well as other transporting tissues (Cabantchik & Rothstein, 1974; Shami, Rothstein & Knauf, 1978). The effects of SITS ( $10^{-4}$  M) on blood respiratory

Table 4. Effect of blood  $P_{CO_2}$  on blood respiratory and acid-base status in the spontaneously ventilating, blood-perfused rainbow trout(n = 6 fish  $\pm$  S.E.M.)

|                               | $C_{CO_2}$<br>(mm)                             | $C_{O_2}$<br>(mm)                             | $P_{O_2}$<br>(mmHg) | $P_{CO_2}$<br>(mmHg) | [H <sup>+</sup> ]<br>(nM)             |
|-------------------------------|------------------------------------------------|-----------------------------------------------|---------------------|----------------------|---------------------------------------|
| Input Blood                   |                                                |                                               |                     |                      |                                       |
| (I) Normal                    | 12.35 $\pm$ 0.8                                | 0.87 $\pm$ 0.2                                | 19.8 $\pm$ 3.1      | 3.31 $\pm$ 0.1       | 13.41 $\pm$ 0.7 (7.88) <sup>†</sup>   |
| (II) High $P_{CO_2}$          | 13.28 $\pm$ 0.5                                | 0.95 $\pm$ 0.2                                | 31.1 $\pm$ 2.5      | 5.60 $\pm$ 0.3**     | 20.38 $\pm$ 1.2 (7.69)**              |
| Dorsal aortic blood           |                                                |                                               |                     |                      |                                       |
| (I) Normal                    | 10.80 $\pm$ 0.7                                | 1.78 $\pm$ 0.3                                | 94.1 $\pm$ 8.1      | 3.49 $\pm$ 0.3       | 15.69 $\pm$ 0.9 (7.81)                |
| (II) High $P_{CO_2}$          | 10.87 $\pm$ 0.5                                | 1.68 $\pm$ 0.3                                | 101.0 $\pm$ 5.3     | 4.46 $\pm$ 0.4**     | 19.68 $\pm$ 1.2 (7.71)**              |
| $\Delta$ Input - Dorsal Aorta |                                                |                                               |                     |                      |                                       |
|                               | $\dot{M}_{CO_2}$<br>( $\mu$ mol/100 g/<br>min) | $\dot{M}_{O_2}$<br>( $\mu$ mol/100 g/<br>min) | $P_{O_2}$<br>(mmHg) | $P_{CO_2}$<br>(mmHg) | [H <sup>+</sup> ]<br>(pmol/100 g/min) |
| (I) Normal                    | 2.56 $\pm$ 0.6                                 | 1.50 $\pm$ 0.2                                | 74.3 $\pm$ 7.6      | 0.19 $\pm$ 0.3       | 3.68 $\pm$ 1.3                        |
| (II) High $P_{CO_2}$          | 3.97 $\pm$ 0.4**                               | 1.20 $\pm$ 0.3                                | 70.9 $\pm$ 5.9      | -1.13 $\pm$ 0.4**    | 1.26 $\pm$ 2.2**                      |

<sup>†</sup> Corresponding pH value.

\* Significantly different from normal value at 10%.

\*\* Significantly different from normal value at 5%.

and acid-base status are shown in Table 3.  $\dot{M}_{CO_2}$  and  $\dot{M}_{O_2}$  decreased significantly following addition of SITS to the input blood. Dorsal aortic  $P_{CO_2}$  and [H<sup>+</sup>] both increased significantly although only  $\Delta P_{CO_2}$  but not  $\Delta H^+$  was significantly different from normal values. Occasionally, perfusion was switched back to SITS-free blood and in these instances (three fish)  $\dot{M}_{CO_2}$  and  $\dot{M}_{O_2}$  were restored to normal levels. SITS treatment caused no significant effects on branchial haemodynamics or ventilation.

Increasing  $P_{CO_2}$  of input blood by 1.7 times (3.3 mmHg to 5.5 mmHg) (Table 4) significantly increased  $\dot{M}_{CO_2}$ , but was without effect on  $\dot{M}_{O_2}$  transfer although input blood  $P_{O_2}$  increased significantly. As in other experiments (also see Davie *et al.* 1982, and Daxboeck *et al.* 1982), normal fish showed net H<sup>+</sup> movements from water to blood. When input blood  $P_{CO_2}$  was elevated, a significant change in direction occurred; net H<sup>+</sup> movement now was from blood to water. Similarly,  $P_{CO_2}$  across the gills changed from a slight increase to a significant decrease. High input  $P_{CO_2}$  was associated with increased dorsal aortic blood [H<sup>+</sup>] and usually was accompanied by a small, slow increase in dorsal aortic pressure.

None of the above experiments, except plasma perfusion, produced any visual signs of stress. Perfusion with plasma evoked a violent struggling response and brief pauses (2–3 s) in ventilatory movements and intrinsic heart beat. Due to the severe nature of these responses, this line of investigation was discontinued.

## (2) Saline-perfused preparations

In contrast to spontaneously ventilating, blood-perfused fish, no saline-perfused preparation displayed measureable  $\dot{M}_{CO_2}$  at physiological  $P_{CO_2}$  and pH except totally

Table 5. *Effects of perfusate  $P_{\text{CO}_2}$  and  $[\text{HCO}_3^-]$  on acid-base status of various saline-perfused preparations*(mean values  $\pm$  S.E.M.)Isolated, saline-perfused trout holobranchs ( $n = 6$ )

|                              | Afferent saline | Efferent saline | $\Delta$          | $\Delta$ (%) |
|------------------------------|-----------------|-----------------|-------------------|--------------|
| (I) Normal $P_{\text{CO}_2}$ |                 |                 |                   |              |
| $C_{\text{CO}_2}$ (mM)       | $8.71 \pm 0.4$  | $8.88 \pm 0.5$  | $0.17 \pm 0.1$    | 2.0          |
| $P_{\text{CO}_2}$ (mmHg)     | $4.01 \pm 0.3$  | $4.76 \pm 0.5$  | $0.75 \pm 0.2$    | 18.7         |
| $[\text{H}^+]$ (nM)          | $19.04 \pm 0.9$ | $21.82 \pm 1.1$ | $2.78 \pm 0.8$    | 14.6         |
| (II) High $P_{\text{CO}_2}$  |                 |                 |                   |              |
| $C_{\text{CO}_2}$ (mM)       | $10.82 \pm 0.6$ | $10.50 \pm 0.6$ | $-0.32 \pm 0.1^*$ | -2.6         |
| $P_{\text{CO}_2}$ (mmHg)     | $15.40 \pm 0.8$ | $13.14 \pm 0.6$ | $-2.26 \pm 0.4^*$ | -14.7        |
| $[\text{H}^+]$ (nM)          | $55.64 \pm 1.7$ | $48.33 \pm 1.8$ | $-7.31 \pm 1.5^*$ | -13.1        |

Totally saline-perfused rainbow trout ( $n = 5$ )

|                              | Input saline    | Dorsal aorta    | $\Delta$          | $\Delta$ (%) |
|------------------------------|-----------------|-----------------|-------------------|--------------|
| (I) Normal $P_{\text{CO}_2}$ |                 |                 |                   |              |
| $C_{\text{CO}_2}$ (mM)       | $10.57 \pm 0.3$ | $11.61 \pm 0.3$ | $1.04 \pm 0.3$    | 9.8          |
| $P_{\text{CO}_2}$ (mmHg)     | $3.14 \pm 0.2$  | $4.80 \pm 0.1$  | $1.66 \pm 0.1$    | 52.9         |
| $[\text{H}^+]$ (nM)          | $12.08 \pm 0.6$ | $16.37 \pm 0.8$ | $42.9 \pm 0.5$    | 35.5         |
| (II) High $P_{\text{CO}_2}$  |                 |                 |                   |              |
| $C_{\text{CO}_2}$ (mM)       | $11.00 \pm 0.4$ | $10.46 \pm 0.3$ | $-0.54 \pm 0.4^*$ | -4.9         |
| $P_{\text{CO}_2}$ (mmHg)     | $9.16 \pm 0.2$  | $9.88 \pm 0.2$  | $0.72 \pm 0.2^*$  | 7.9          |
| $[\text{H}^+]$ (nM)          | $32.28 \pm 1.1$ | $36.48 \pm 1.3$ | $4.20 \pm 0.9$    | 13.0         |

Totally saline-perfused coho salmon ( $n = 5$ )

|                               | Input saline    | Dorsal aorta    | $\Delta$        | $\Delta$ (%) | TMP | $\Delta P_{\text{O}_2}$ (mmHg) |
|-------------------------------|-----------------|-----------------|-----------------|--------------|-----|--------------------------------|
| (I) Normal $[\text{HCO}_3^-]$ |                 |                 |                 |              |     |                                |
| $C_{\text{CO}_2}$ (mM)        | $11.86 \pm 0.4$ | $11.72 \pm 0.4$ | $-0.14 \pm 0.2$ | -1.2         | -21 | 20                             |
| (II) High $[\text{HCO}_3^-]$  |                 |                 |                 |              |     |                                |
| $C_{\text{CO}_2}$ (mM)        | $33.15 \pm 0.7$ | $33.30 \pm 0.8$ | $0.15 \pm 0.2$  | 0.5          | -21 | —                              |

\* Significantly different from normal value at 5%.

perfused coho salmon; and this was not significant (Table 5). In fact,  $C_{\text{CO}_2}$  usually was higher in post-gill saline indicating a net uptake of  $\text{CO}_2$ . Only when perfusate  $P_{\text{CO}_2}$  was increased to 2%  $\text{CO}_2$  (15 mmHg; perfused holobranchs) or 1.2%  $\text{CO}_2$  (9 mmHg; totally perfused rainbow trout), was  $\dot{M}_{\text{CO}_2}$  measurable. The differences in  $C_{\text{CO}_2}$  across the gill between normal and high  $P_{\text{CO}_2}$  groups are highly significant ( $P < 0.05$ ). Also in contrast to blood-perfused fish, perfusate  $[\text{HCO}_3^-]$  had no effect on  $\dot{M}_{\text{CO}_2}$  in totally perfused coho salmon (Table 5). The trans-membrane potential (basal membrane of gill epithelial cells), as measured with microelectrodes (Maetz & Campanini, 1966), also did not vary from -21 mV (inside of cell negative) as  $[\text{HCO}_3^-]$  was raised (Table 5).

## DISCUSSION

The results of the present studies clearly demonstrate an important involvement of trout erythrocytes in  $\text{CO}_2$  excretion and as such, oppose the theory of Haswell & Randall (1978) that the teleost red blood cell is functionally impermeable to plasma bicarbonate. Much of the evidence supporting non-involvement of the teleost



Erythrocyte has come from *in vivo* studies using anaemic fish (Haswell, 1978; Haswell & Randall, 1978). These experiments showed that CO<sub>2</sub> excretion, arterial pH and  $P_{\text{CO}_2}$  did not vary following 24 h of severe anaemia in rainbow trout. The present results however, show a highly significant positive correlation between Hct and  $\dot{M}_{\text{CO}_2}$ . In addition, Daxboeck *et al.* (1982) observed a similar relationship between Hct and  $\dot{M}_{\text{O}_2}$ , indicating a common pathway through the erythrocyte. The differences between the studies are probably a result of the profound cardiovascular adjustments associated with severely anaemic fish, particularly increased cardiac output ( $\dot{Q}$ ) (Wood, McMahon & McDonald, 1979; Wood & Shelton, 1980) due to increased stroke volume (Cameron & Davis, 1970). These responses, by increasing the delivery of physically dissolved CO<sub>2</sub> to the gills, would maintain net  $\dot{M}_{\text{CO}_2}$ , thereby masking any effects of anaemia on CO<sub>2</sub> excretion. In our experiments, using the spontaneously ventilating, blood-perfused trout, we were able to maintain  $\dot{Q}$  constant thereby eliminating the effects of cardiovascular changes on  $\dot{M}_{\text{CO}_2}$ . Branchial vascular resistance increased both during low and high Hct experiments (see Davie *et al.* 1982) so it is unlikely that changes in branchial haemodynamics contributed to the overall results. Thus we are confident that our results reflect only the concentration of circulating erythrocytes. Recently, Wood, McDonald & McMahon (1981) observed that severe experimental anaemia (1–5 % Hct) in starry flounder (*Platichthys stellatus*) and rainbow trout caused respiratory acidosis (decreased pH, increased  $P_{\text{CO}_2}$ ) supporting the conclusion that plasma bicarbonate is dehydrated within erythrocytes in a typical mammalian fashion (Cameron & Polhemus, 1974). Unlike the present study, however, Wood *et al.* (1981) found no effect on blood acid-base status until a Hct of between 5–10 % was reached. Again, this is probably attributable to cardiovascular adjustments which can maintain  $\dot{M}_{\text{CO}_2}$  during mild anaemia in intact fish. At Hcts below 10 % it is likely that these compensatory adjustments are no longer sufficient to maintain  $\dot{M}_{\text{CO}_2}$  and blood acid-base status.

Cameron (1978) demonstrated that teleost blood (red snapper and rainbow trout) displayed a typical chloride shift ( $\text{HCO}_3^-/\text{Cl}^-$  exchange) which could be abolished by addition of the carbonic anhydrase inhibitor, acetazolamide. Obaid, Critz & Crandall (1979) also have shown the presence of  $\text{HCO}_3^-/\text{Cl}^-$  exchange in dogfish erythrocytes which was blocked by the anion transport inhibitor, SITS. These results, together with the findings of this study, present overwhelming evidence opposing the theory of Haswell & Randall (1978) that fish erythrocytes are functionally impermeable to  $\text{HCO}_3^-$ . Results from *in vitro* experiments, which indicate the presence of a plasma inhibitor rendering erythrocytic carbonic anhydrase unavailable to catalyse plasma  $\text{HCO}_3^-$  dehydration (Haswell & Randall, 1976), can be attributed to methodological problems (see Heming & Randall, 1982).

Confirmation that teleost red blood cells are involved in CO<sub>2</sub> excretion does not exclude the possibility that the branchial epithelium also is involved in the dehydration of plasma  $\text{HCO}_3^-$ . In fact, movement of  $\text{HCO}_3^-$  between plasma and gill epithelial cells has been proposed (Haswell, Randall & Perry, 1980) and investigated indirectly (Perry *et al.* 1981). The data of Perry *et al.* (1981) demonstrated that pharmacological inhibition of apical branchial  $\text{Na}^+/\text{H}^+(\text{NH}_4^+)$  or  $\text{Cl}^-/\text{HCO}_3^-$  exchange mechanisms results in significant decreases and increases in plasma  $C_{\text{CO}_2}$ , respectively. These

authors concluded that  $\text{HCO}_3^-$  entry into the gill epithelium is in part controlled by epithelial cell pH and is an important factor determining overall  $\text{CO}_2$  excretion and blood acid-base status. Re-evaluation of the results however reveals that these changes alternatively might be due to changing rates of proton movements between plasma and epithelial cells, thereby altering the  $\text{CO}_2$ - $\text{HCO}_3^-$  equilibrium in plasma. Indeed, recent work by McWilliams & Potts (1978) has shown that the gill epithelium is extremely permeable to  $\text{H}^+$  ions. Because of these uncertainties, additional experiments were performed with the blood-perfused preparation and various saline-perfused preparations in order to investigate this problem and to assess the relative contributions of red blood cells and the branchial epithelium to  $\text{CO}_2$  excretion. If the branchial epithelium is permeable to  $\text{HCO}_3^-$  and the entry of  $\text{HCO}_3^-$  into gill epithelial cells is a major pathway for  $\text{CO}_2$  excretion, one would expect saline-perfused gill preparations to excrete  $\text{CO}_2$  at rates comparable to live intact fish or blood-perfused preparations. Furthermore,  $\text{CO}_2$  excretion should be proportional to the concentration of perfusate  $\text{HCO}_3^-$ .

It is evident that saline-perfused preparations do not excrete  $\text{CO}_2$  at physiological  $P_{\text{CO}_2}$  and pH whereas blood-perfused fish do, at rates comparable to published *in vivo* data (see also Davie *et al.* 1982). Although this may be due, in part, to increased diffusion barriers to get transfer in saline-perfused preparations, we feel this is unlikely to explain the absence of  $\dot{M}_{\text{CO}_2}$  for the following reasons. Totally saline-perfused coho salmon displayed no significant  $\text{CO}_2$  excretion but did not show an increase in dorsal aortic  $P_{\text{O}_2}$  above input levels of approximately 20 mmHg (Table 5). Nor do we believe that the absence of  $\dot{M}_{\text{CO}_2}$  in saline-perfused preparations is due to artificial ventilation. In another series of experiments (unpublished observations) blood-perfused fish were ventilated artificially by providing a pressure head of water (no longer spontaneously ventilating) and  $\dot{M}_{\text{CO}_2}$  and  $\dot{M}_{\text{O}_2}$  were unaffected. Furthermore, perfusion of spontaneously ventilating fish with plasma completely abolished  $\dot{M}_{\text{CO}_2}$  but was without effect on dorsal aortic  $P_{\text{O}_2}$ . Clearly, the differences observed between saline and blood-perfusion must be due to the presence or absence of erythrocytes.

Increasing the concentration of  $\text{HCO}_3^-$  in the input blood of perfused fish caused a dramatic increase in  $\dot{M}_{\text{CO}_2}$ . This is due to increased flux of  $\text{HCO}_3^-$  into red blood cells and not into the gill epithelium. We conclude this for two reasons; first, because of the accompanying effect on oxygen transport and secondly, because of the lack of an effect of increased  $\text{HCO}_3^-$  in totally saline-perfused fish. That  $\text{HCO}_3^-$  is without effect in saline-perfused fish indicates that the branchial epithelium (basal membrane) is impermeable to  $\text{HCO}_3^-$  and that its movement from plasma to epithelium cannot constitute a major pathway for  $\text{CO}_2$  excretion. Measurements of a constant trans-membrane potential (basal membrane) of gill epithelial cells at all concentrations of perfusate  $\text{HCO}_3^-$  support this conclusion. The decrease in dorsal aortic  $P_{\text{O}_2}$  during high  $\text{HCO}_3^-$  blood perfusion is not related to lower input  $P_{\text{O}_2}$  because fluctuations of input  $P_{\text{O}_2}$  in this range ( $\sim 10$  mmHg) did not affect dorsal aortic  $P_{\text{O}_2}$  of normal fish (see Davie *et al.* 1982). An alternative explanation is increased entry of  $\text{HCO}_3^-$  into the red blood cell thereby facilitating  $\text{O}_2$  binding to haemoglobin, and reducing the amount in solution.

Whereas saline [ $\text{HCO}_3^-$ ] had no effect on  $\dot{M}_{\text{CO}_2}$ , increasing  $P_{\text{CO}_2}$  in saline-perfused

Globranchs and totally saline-perfused trout did stimulate CO<sub>2</sub> excretion which was significantly increased from normal values. Similar results were obtained from blood-perfused fish with increased  $P_{\text{CO}_2}$ . Thus, increasing the amount of dissolved CO<sub>2</sub> in blood or saline can increase  $\dot{M}_{\text{CO}_2}$ , probably by enhanced diffusion of molecular CO<sub>2</sub> across the branchial epithelium. Haswell & Randall (1978) perfused fish with saline equilibrated with 1% CO<sub>2</sub> in air (pH 7.5). This may account for the discrepancy between their results, showing CO<sub>2</sub> excretion in saline-perfused fish, and the results of the present study.

The results of studies comparing blood-perfused and saline-perfused preparations indicate that the gill epithelium is impermeable to HCO<sub>3</sub><sup>-</sup> and that movement of HCO<sub>3</sub><sup>-</sup> from plasma to gill epithelial cells does not contribute to CO<sub>2</sub> excretion or acid-base balance. Moreover, it is clear that the entry of HCO<sub>3</sub><sup>-</sup> into the erythrocyte is the rate limiting step in CO<sub>2</sub> excretion and that the only contribution of the branchial epithelium to this process is via diffusion of molecular CO<sub>2</sub> and apical Cl<sup>-</sup>/HCO<sub>3</sub><sup>-</sup> exchange (Fig. 2).

Results from this study and others (McWilliams & Potts, 1978; van den Thillart & Randall, in preparation) have shown that net H<sup>+</sup> ion movement across the gill is related to the [H<sup>+</sup>] ion gradient between blood and water. Increasing [HCO<sub>3</sub><sup>-</sup>] of input blood certainly increases this gradient, yet net H<sup>+</sup> ion influx is reduced significantly (Table 2). This can be explained by enhanced H<sup>+</sup> ion excretion via combination with HCO<sub>3</sub><sup>-</sup> forming CO<sub>2</sub> which diffuses into the water. Normally, O<sub>2</sub> binding to haemoglobin will provide protons to maintain an RQ of 0.7 if all CO<sub>2</sub> is derived from bicarbonate (German & Wyman, 1937). RE<sub>g</sub> changed from 1.4 to 7.7 during high HCO<sub>3</sub><sup>-</sup> perfusion. Clearly, to maintain an RE<sub>g</sub> of 7.7 requires a source of protons other than that derived from haemoglobin oxygenation. Two possible sources are first those released from proteins, especially haemoglobin if pH rises, and second protons that diffuse into the blood from other compartments. Blood pH did not rise during passage through the gills, thus the proton source must have come from another compartment, either the gill tissue or the water and not from blood proteins. Given that the gill epithelium is highly permeable to H<sup>+</sup> ions, plus the large number of protons required, influx from the water is the most probable source.

SITS is a potent inhibitor of anion movements across the mammalian red blood cell (Cabantchik & Rothstein, 1974; Cabantchik, Knauf & Rothstein, 1978; Shami *et al.* 1978). Again, we believe the inhibitory action of SITS on  $\dot{M}_{\text{CO}_2}$  in blood-perfused fish is due to inhibition of erythrocytic HCO<sub>3</sub><sup>-</sup>/Cl<sup>-</sup> exchange and not to inhibition of HCO<sub>3</sub><sup>-</sup> movement into gill epithelial cells. The decreases in  $\dot{M}_{\text{O}_2}$  associated with SITS treatment must be due to abolition of the chloride shift which decreases red blood cell pH and reduces blood O<sub>2</sub> capacity via the Root shift. The increase in input blood  $P_{\text{O}_2}$  also can be attributed to a Bohr shift to the right (due to decreased rbc pH).

Fish, unlike mammals, do not utilize changes in ventilation to achieve pH regulation during acid-base disturbances. Instead, plasma HCO<sub>3</sub><sup>-</sup> levels are adjusted and the  $P_{\text{CO}_2}$  gradient between blood and water remains constant (Cameron & Randall, 1972; Janssen & Randall, 1975; Cameron, 1978). For plasma bicarbonate levels to rise during hypercapnic acidosis, either H<sup>+</sup> excretion must be enhanced or carbon dioxide

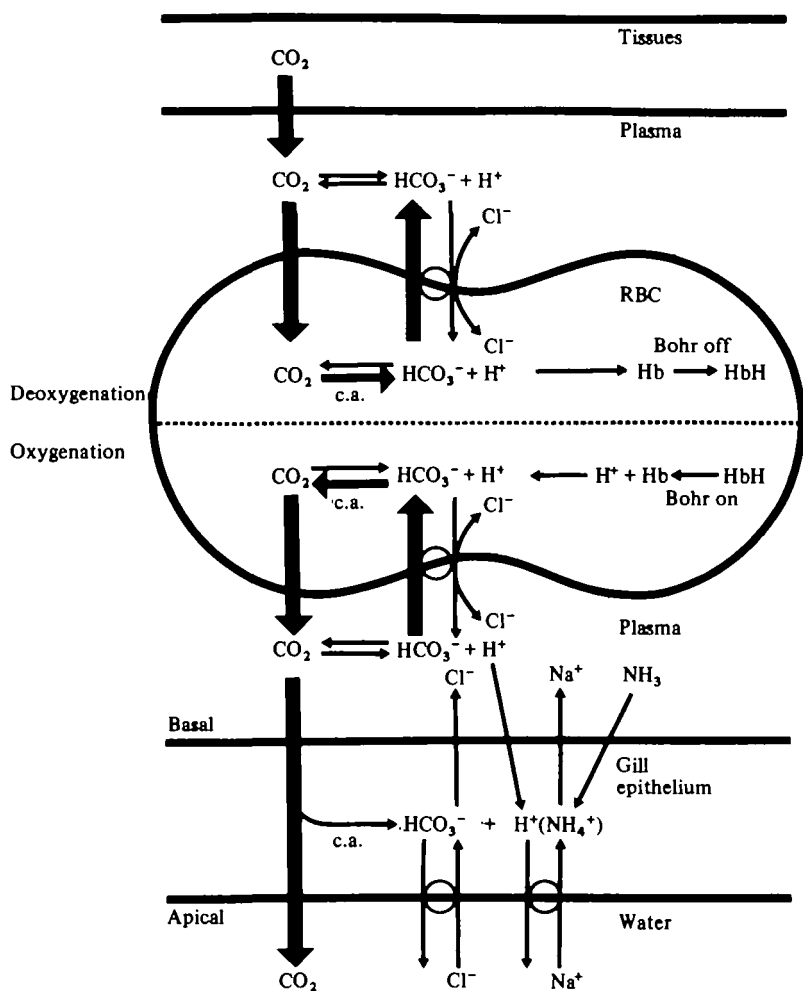

Fig. 2. A diagrammatic representation of carbon dioxide excretion and ion movements in the rainbow trout, *Salmo gairdneri*. See text for further details.

excretion reduced. It is unlikely that intracellular buffering can account for the large increase in plasma HCO<sub>3</sub><sup>-</sup> observed during hypercapnic acidosis. We believe that H<sup>+</sup> ion excretion is independent of CO<sub>2</sub> excretion and that the movement of H<sup>+</sup> ions from plasma to gill epithelial cells is related to intracellular pH which in turn is controlled by the rates of the apical ion exchange mechanisms (Fig. 2). Modulations of these exchange mechanisms have been shown to affect blood acid-base balance of freshwater trout (de Renzis & Maetz, 1973; Perry *et al.* 1981). Cameron (1976) has observed changes in apical Na<sup>+</sup>/H<sup>+</sup>(NH<sub>4</sub><sup>+</sup>) and Cl<sup>-</sup>/HCO<sub>3</sub><sup>-</sup> exchanges during hypercapnic acidosis in Arctic grayling (*Thymallus arcticus*) sufficient to inhibit net movement of H<sup>+</sup> ions into gill epithelial cells, causing plasma HCO<sub>3</sub><sup>-</sup> levels to rise. Thus pH compensation during hypercapnic acidosis may be accomplished without grossly affecting CO<sub>2</sub> excretion. How these regulatory mechanisms are controlled is

It is well understood. Recent work however (S. F. Perry, P. Payan & J. P. Girard, in preparation) has shown that Cl<sup>-</sup>/HCO<sub>3</sub><sup>-</sup> exchange in isolated, saline-perfused head preparations of rainbow trout is under adrenergic control.  $\beta$ -receptors inhibit while  $\alpha$ -receptors stimulate Cl<sup>-</sup>/HCO<sub>3</sub><sup>-</sup> exchange. Similarly, Girard & Payan (1977) found that  $\beta$ -receptors stimulate Na<sup>+</sup>/H<sup>+</sup>(NH<sub>4</sub><sup>+</sup>) exchange in the same preparation. It is possible that levels of circulating catecholamines increase during hypercapnic acidosis, as they do during periods of imposed stress (Nakano & Tomlinson, 1967), thereby causing the appropriate modulations of branchial ion exchanges. Another possible explanation for the compensatory increase in plasma HCO<sub>3</sub><sup>-</sup> is inhibition of CO<sub>2</sub> excretion. Knowing that the branchial epithelium is impermeable to HCO<sub>3</sub><sup>-</sup>, the most likely controllable process in CO<sub>2</sub> excretion is erythrocytic HCO<sub>3</sub><sup>-</sup>/Cl<sup>-</sup> exchange. Preliminary investigation has demonstrated that HCO<sub>3</sub><sup>-</sup> entry into rainbow trout erythrocytes is inhibited by adrenaline (T. A. Heming, & S. F. Perry, in preparation). It is possible that both branchial and erythrocytic HCO<sub>3</sub><sup>-</sup>/Cl<sup>-</sup> exchanges are controlled in a similar manner. The possible role of catecholamines in regulating acid-base disturbances by these mechanisms is being investigated currently.

This work was supported by an N.S.E.R.C. grant to D.J.R. P.S. Davie was a recipient of a Killam Postdoctoral Fellowship.

## REFERENCES

- ALBERS, C. (1970). Acid-base balance, In *Fish Physiology*, vol. iv (ed. W. S. Hoar and D. J. Randall), pp. 173-208. New York: Academic Press.
- CABANTCHIK, Z. I. & ROTHSTEIN, A. (1974). Membrane proteins related to anion permeability of human red blood cells. I. Localization of disulfonic stilbene binding sites in proteins involved in permeation. *J. Membrane Biol.* **15**, 207-226.
- CABANTCHIK, Z. I., KNAUF, P. A. & ROTHSTEIN, A. (1978). The anion transport system of the red blood cell: the role of membrane proteins evaluated by the use of 'probes'. *Biochim. biophys. Acta* **515**, 239-302.
- CAMERON, J. N. & DAVIES, J. C. (1970). Gas exchange in rainbow trout (*Salmo gairdneri*) with varying blood oxygen capacity. *J. Fish. Res. Bd. Can.* **27**, 1069-1085.
- CAMERON, J. N. (1971). Rapid method for determination of total carbon dioxide in small blood samples. *J. appl. Physiol.* **133**, 233-240.
- CAMERON, J. N. & RANDALL, D. J. (1972). The effect of increased ambient CO<sub>2</sub> on arterial CO<sub>2</sub> tension, CO<sub>2</sub> content and pH in rainbow trout, *Salmo gairdneri*. *J. exp. Biol.* **57**, 673-680.
- CAMERON, J. N. & POLHEMUS, J. A. (1974). Theory of CO<sub>2</sub> exchange in trout gills. *J. exp. Biol.* **60**, 183-194.
- CAMERON, J. N. (1976). Branchial ion uptake in the Arctic grayling: resting values and effects of acid-base disturbance. *J. exp. Biol.* **64**, 711-725.
- CAMERON, J. N. (1978). Regulation of blood pH in teleost fish. *Resp. Physiol.* **25**, 235-245.
- CAMERON, J. N. (1978). Chloride shift in fish blood. *J. exp. Zool.* **206**, 289-295.
- DAVIE, P. S., DAXBOECK, C., PERRY, S. F. & RANDALL, D. J. (1982). Gas transfer in a spontaneously ventilating, blood-perfused trout preparation. *J. exp. Biol.* **101**, 17-34.
- DAXBOECK, C., DAVIE, P. S., PERRY, S. F. & RANDALL, D. J. (1982). Oxygen uptake in a spontaneously ventilating, blood-perfused trout preparation. *J. exp. Biol.* **101**, 35-45.
- DE RENZIS, G. & MAETZ, J. (1973). Studies on the mechanism of chloride absorption by the goldfish gill: relation with acid-base regulation. *J. exp. Biol.* **59**, 339-358.
- FARRELL, A. P., DAXBOECK, C. & RANDALL, D. J. (1979). The effect of input pressure and flow on the pattern and resistance to flow in the isolated perfused gill of a teleost fish. *J. comp. Physiol.* **133**, 233-240.
- GERMAN, B. & WYMAN, J., Jr. (1937). The titration curves of oxygenated and reduced haemoglobin. *J. biol. Chem.* **117**, 533-550.

- GIRARD, J. P. & PAYAN, P. (1977). Kinetic analysis of sodium and chloride influxes across the of the trout in fresh water. *J. Physiol., Lond.* **273**, 195-209.
- HASWELL, M. S. & RANDALL, D. J. (1976). Carbonic anhydrase inhibitor in trout plasma. *Resp. Physiol.* **28**, 17-27.
- HASWELL, M. S. & RANDALL, D. J. (1978). The pattern of carbon dioxide excretion in the rainbow trout, *Salmo gairdneri*. *J. exp. Biol.* **72**, 17-22.
- HASWELL, M. S. (1978). CO<sub>2</sub> excretion and acid-base regulation in the rainbow trout, *Salmo gairdneri*. Ph.D. thesis, University of British Columbia.
- HASWELL, M. S., RANDALL, D. J. & PERRY, S. F. (1980). Fish gill carbonic anhydrase: acid-base regulation or salt transport? *Am. J. Physiol.* **238**, 240-245.
- HEMING, T. A. & RANDALL, D. J. (1982). Fish erythrocytes are bicarbonate permeable: problems with determining carbonic anhydrase activity using the modified boat technique. *J. exp. Zool.* **219**, 125-128.
- HOUSTON, A. H., MADDEN, J. A., WOODS, R. J. & MILES, H. M. (1971). Variations in the blood and tissue chemistry of brook trout (*Salvelinus fontinalis*), subsequent to handling, anaesthesia, and surgery. *J. Fish. Res. Bd. Can.* **28**, 625-633.
- JANSSEN, R. G. & RANDALL, D. J. (1975). The effect of changes in pH and P<sub>OO<sub>2</sub></sub> in blood and water on breathing in rainbow trout (*Salmo gairdneri*). *Resp. Physiol.* **25**, 235-245.
- KICENIUK, J. W. & JONES, D. R. (1977). The oxygen transport in trout during sustained exercise. *J. exp. Biol.* **68**, 1-14.
- MAETZ, J. & CAMPANINI, G. (1966). Potentiels transepitheliaux de la branchie d'anguille *in vivo* en eau douce et en eau de mer. *J. Physiol., Paris* **58**, 248 (abstract).
- MAETZ, J. (1971). Fish gills: mechanisms of salt transfer in fresh water and sea water. *Phil. Trans. R. Soc. Lond. B*, **262**, 209-249.
- MCWILLIAMS, P. G. & POTTS, W. T. W. (1978). The effects of pH and calcium concentration on gill potentials in the brown trout (*Salmo trutta*). *J. comp. Physiol.* **126**, 277-286.
- OBAID, A. L., CRITZ, A. M. & CRANDALL, E. D. (1979). Kinetics of bicarbonate/chloride exchanges in dogfish erythrocytes. *Am. J. Physiol.* **237**, 132-138.
- PERRY, S. F., HASWELL, M. S., RANDALL, D. J. & FARRELL, A. P. (1981). Branchial ionic uptake and acid-base regulation in the rainbow trout, *Salmo gairdneri*. *J. exp. Biol.* **92**, 289-303.
- RANDALL, D. J., BURGGREN, W. W., FARRELL, A. P. & HASWELL, M. S. (1981). *The Evolution of Air Breathing in Vertebrates*. Cambridge University Press.
- SEVERINGHAUS, J. W., STUFFEL, M. & BRADLEY, A. F. (1956). Variations of serum carbonic acid pK' with pH and temperature. *J. appl. Physiol.* **9**, 197-200.
- SHAMI, Y., ROTHSTEIN, A. & KNAUF, P. A. (1978). Identification of the chloride transport site of human red blood cells by kinetic analysis of the inhibitory effects of a chemical probe. *Biochim. biophys. Acta*, **508**, 357-363.
- SMITH, L. S. & BELL, G. R. (1967). Anesthetic and surgical techniques for Pacific salmon. *J. Fish. Res. Bd. Can.* **24**, 1579-1588.
- WOLF, K. (1963). Physiological salines for fresh water teleosts. *Prog. Fish. Cult.* **25**, 135-140.
- WOOD, C. M., McMAHON, B. R. & McDONALD, D. G. (1978). Oxygen exchange and vascular resistance in the totally perfused rainbow trout, *Am. J. Physiol.* **234**, 201-208.
- WOOD, C. M., McMAHON, B. R. & McDONALD, D. G. (1979). Respiratory, ventilatory and cardiovascular responses to experimental anaemia in the starry flounder, *Platichthys stellatus*. *J. exp. Biol.* **82**, 139-162.
- WOOD, C. M. & SHELTON, G. (1980). Cardiovascular dynamics and adrenergic responses of the rainbow trout *in vivo*. *J. exp. Biol.* **87**, 247-270.
- WOOD, C. M., McDONALD, D. G. & McMAHON, B. R. (1981). The influence of experimental anaemia on blood acid-base regulation *in vivo* and *in vitro* in the starry flounder (*Platichthys stellatus*) and the rainbow trout (*Salmo gairdneri*). *J. exp. Biol.* **96**, 221-237.
